# Supplementary material for: hemaClass.org: Online One-By-One Microarray Normalization and Classification of Hematological Cancers for Precision Medicine
Source: PubMed Central journal article supplement (PMC5049784; doi:10.1371/journal.pone.0163711), 2016-10-04
Supplement: pone.0163711.s002.pdf [file pone.0163711.s002.pdf]

Table S1: Confusion tables for the ABC/GCB classifiers. The columns represent cohort based normalization using the ABC/GCB classifier based on elastic net. The first part of the table compares Wright’s method for ABC/GCB classification with the elastic net based. In the second and third part ExLab and InLab reference based normalization is compared to cohort based normalization using the ABC/GCB classifier based on elastic net.

|                            | <b>CHEPRETRO</b> |    |     | <b>MDFCI</b> |    |     | <b>IDRC</b> |    |     | <b>LLMPP R-CHOP</b> |    |     |
|----------------------------|------------------|----|-----|--------------|----|-----|-------------|----|-----|---------------------|----|-----|
|                            | ABC              | NC | GCB | ABC          | NC | GCB | ABC         | NC | GCB | ABC                 | NC | GCB |
| <b>Wright’s method</b>     |                  |    |     |              |    |     |             |    |     |                     |    |     |
| ABC                        | 38               | 2  | 0   | 28           | 14 | 0   | 188         | 24 | 1   | 90                  | 3  | 0   |
| NC                         | 1                | 4  | 0   | 1            | 11 | 3   | 6           | 27 | 14  | 6                   | 19 | 8   |
| GCB                        | 0                | 2  | 42  | 0            | 1  | 29  | 7           | 35 | 193 | 0                   | 5  | 102 |
| <b>ExLab Normalization</b> |                  |    |     |              |    |     |             |    |     |                     |    |     |
| ABC                        | 34               | 0  | 0   | 24           | 0  | 0   | 95          | 0  | 0   | 76                  | 0  | 0   |
| NC                         | 5                | 2  | 0   | 6            | 4  | 0   | 102         | 19 | 0   | 20                  | 6  | 0   |
| GCB                        | 0                | 6  | 42  | 0            | 22 | 35  | 4           | 67 | 208 | 0                   | 21 | 110 |
| <b>InLab Normalization</b> |                  |    |     |              |    |     |             |    |     |                     |    |     |
| ABC                        | 26               | 0  | 0   | 19           | 0  | 0   | 183         | 9  | 0   | 86                  | 6  | 0   |
| NC                         | 0                | 5  | 0   | 0            | 19 | 0   | 6           | 63 | 7   | 0                   | 13 | 4   |
| GCB                        | 0                | 1  | 27  | 0            | 1  | 22  | 0           | 9  | 188 | 0                   | 2  | 92  |
