# Supplementary material for: hemaClass.org: Online One-By-One Microarray Normalization and Classification of Hematological Cancers for Precision Medicine
Source: PubMed Central journal article supplement (PMC5049784; doi:10.1371/journal.pone.0163711), 2016-10-04
Supplement: pone.0163711.s003.pdf [file pone.0163711.s003.pdf]

Table S2: Confusion tables for the BAGS classifier. ExLab and InLab reference based normalization are shown in the columns and cohort normalization in the rows.

|                     | ExLab normalization |    |     |   |    |    | InLab normalization |    |     |    |    |    |
|---------------------|---------------------|----|-----|---|----|----|---------------------|----|-----|----|----|----|
|                     | N                   | CB | CC  | M | PB | UC | N                   | CB | CC  | M  | PB | UC |
| <b>CHEPRETRO</b>    |                     |    |     |   |    |    |                     |    |     |    |    |    |
| Naive               | 1                   | 0  | 0   | 0 | 0  | 1  | 2                   | 0  | 0   | 0  | 0  | 0  |
| Centroblast         | 0                   | 18 | 0   | 0 | 0  | 0  | 0                   | 4  | 4   | 0  | 0  | 1  |
| Centrocyte          | 0                   | 10 | 11  | 0 | 5  | 9  | 0                   | 0  | 25  | 1  | 0  | 0  |
| Memory              | 0                   | 0  | 0   | 3 | 0  | 1  | 0                   | 0  | 0   | 2  | 0  | 0  |
| Plasmablast         | 0                   | 0  | 0   | 0 | 16 | 0  | 0                   | 0  | 0   | 0  | 8  | 3  |
| Unclassified        | 0                   | 7  | 0   | 0 | 4  | 3  | 0                   | 0  | 2   | 2  | 0  | 5  |
| <b>MDFCI</b>        |                     |    |     |   |    |    |                     |    |     |    |    |    |
| Naive               | 1                   | 1  | 0   | 1 | 2  | 3  | 3                   | 0  | 0   | 1  | 0  | 2  |
| Centroblast         | 0                   | 18 | 0   | 0 | 1  | 0  | 0                   | 9  | 0   | 0  | 0  | 3  |
| Centrocyte          | 0                   | 7  | 8   | 2 | 10 | 6  | 0                   | 0  | 22  | 1  | 0  | 1  |
| Memory              | 0                   | 0  | 0   | 6 | 0  | 0  | 0                   | 0  | 0   | 5  | 0  | 0  |
| Plasmablast         | 0                   | 0  | 0   | 0 | 11 | 0  | 0                   | 0  | 0   | 0  | 7  | 0  |
| Unclassified        | 0                   | 1  | 0   | 1 | 7  | 5  | 1                   | 0  | 0   | 2  | 1  | 3  |
| <b>IDRC</b>         |                     |    |     |   |    |    |                     |    |     |    |    |    |
| Naive               | 0                   | 0  | 3   | 0 | 6  | 4  | 12                  | 0  | 0   | 0  | 1  | 0  |
| Centroblast         | 0                   | 16 | 27  | 0 | 27 | 22 | 2                   | 62 | 2   | 0  | 5  | 12 |
| Centrocyte          | 0                   | 0  | 140 | 0 | 39 | 18 | 1                   | 2  | 146 | 7  | 8  | 18 |
| Memory              | 0                   | 0  | 1   | 8 | 20 | 10 | 0                   | 0  | 0   | 35 | 3  | 1  |
| Plasmablast         | 0                   | 0  | 1   | 0 | 74 | 4  | 0                   | 0  | 0   | 1  | 76 | 1  |
| Unclassified        | 0                   | 0  | 14  | 0 | 44 | 17 | 7                   | 0  | 0   | 9  | 16 | 38 |
| <b>LLMPP R-CHOP</b> |                     |    |     |   |    |    |                     |    |     |    |    |    |
| Naive               | 1                   | 2  | 0   | 0 | 5  | 6  | 8                   | 0  | 0   | 1  | 0  | 1  |
| Centroblast         | 0                   | 32 | 0   | 0 | 2  | 7  | 0                   | 37 | 1   | 0  | 0  | 1  |
| Centrocyte          | 0                   | 5  | 54  | 0 | 18 | 12 | 0                   | 1  | 66  | 1  | 1  | 4  |
| Memory              | 0                   | 0  | 0   | 5 | 13 | 4  | 0                   | 0  | 0   | 22 | 0  | 0  |
| Plasmablast         | 0                   | 0  | 0   | 0 | 32 | 0  | 0                   | 0  | 0   | 1  | 24 | 4  |
| Unclassified        | 0                   | 2  | 0   | 0 | 27 | 6  | 7                   | 1  | 0   | 1  | 0  | 21 |
