# Supplementary material for: hemaClass.org: Online One-By-One Microarray Normalization and Classification of Hematological Cancers for Precision Medicine
Source: PubMed Central journal article supplement (PMC5049784; doi:10.1371/journal.pone.0163711), 2016-10-04
Supplement: pone.0163711.s004.pdf [file pone.0163711.s004.pdf]

Table S3: Confusion tables for the REGS classifiers. ExLab normalization is shown in the rows and cohort normalization in the columns.

|                         | <b>CHEPRETRO</b> |     |     | <b>MDFCI</b> |     |     | <b>IDRC</b> |     |     | <b>LLMPP R-CHOP</b> |     |     |
|-------------------------|------------------|-----|-----|--------------|-----|-----|-------------|-----|-----|---------------------|-----|-----|
|                         | Sen              | Int | Res | Sen          | Int | Res | Sen         | Int | Res | Sen                 | Int | Res |
| <b>Cyclophosphamide</b> |                  |     |     |              |     |     |             |     |     |                     |     |     |
| Sensitive               | 40               | 1   | 0   | 34           | 5   | 0   | 178         | 0   | 0   | 108                 | 2   | 0   |
| Intermediate            | 6                | 17  | 0   | 0            | 15  | 6   | 114         | 0   | 0   | 8                   | 32  | 1   |
| Resistant               | 0                | 3   | 22  | 0            | 1   | 30  | 203         | 0   | 0   | 0                   | 15  | 67  |
| <b>Doxorubicin</b>      |                  |     |     |              |     |     |             |     |     |                     |     |     |
| Sensitive               | 30               | 0   | 0   | 29           | 0   | 0   | 25          | 86  | 39  | 77                  | 0   | 0   |
| Intermediate            | 21               | 6   | 0   | 32           | 0   | 0   | 0           | 6   | 170 | 78                  | 1   | 0   |
| Resistant               | 0                | 14  | 18  | 6            | 12  | 12  | 0           | 0   | 169 | 13                  | 43  | 21  |
| <b>Vincristine</b>      |                  |     |     |              |     |     |             |     |     |                     |     |     |
| Sensitive               | 36               | 0   | 0   | 33           | 0   | 0   | 42          | 90  | 33  | 78                  | 0   | 0   |
| Intermediate            | 7                | 9   | 0   | 24           | 2   | 0   | 1           | 17  | 136 | 59                  | 15  | 0   |
| Resistant               | 1                | 10  | 26  | 1            | 15  | 16  | 1           | 3   | 172 | 11                  | 36  | 34  |
| <b>Combined</b>         |                  |     |     |              |     |     |             |     |     |                     |     |     |
| Sensitive               | 32               | 0   | 0   | 33           | 0   | 0   | 135         | 14  | 1   | 87                  | 0   | 0   |
| Intermediate            | 19               | 9   | 0   | 27           | 1   | 0   | 19          | 143 | 21  | 70                  | 0   | 0   |
| Resistant               | 0                | 13  | 16  | 3            | 13  | 14  | 0           | 27  | 135 | 16                  | 42  | 18  |
