# Supplementary material for: hemaClass.org: Online One-By-One Microarray Normalization and Classification of Hematological Cancers for Precision Medicine
Source: PubMed Central journal article supplement (PMC5049784; doi:10.1371/journal.pone.0163711), 2016-10-04
Supplement: pone.0163711.s007.pdf [file pone.0163711.s007.pdf]

| Dataset      | RMA reference | Threshold | Sensitivity | Specificity |
|--------------|---------------|-----------|-------------|-------------|
| CHEPRETRO    | LLMPP CHOP    | 0.60      | 0.95        | 0.98        |
| CHEPRETRO    | LLMPP R-CHOP  | 0.48      | 0.58        | 0.85        |
| CHEPRETRO    | IDRC          | 0.72      | 1.00        | 1.00        |
| CHEPRETRO    | MDFCI         | 0.42      | 0.27        | 1.00        |
| LLMPP R-CHOP | LLMPPP CHOP   | 0.61      | 0.98        | 1.00        |
| LLMPP R-CHOP | CHEPRETRO     | 0.52      | 0.93        | 0.97        |
| LLMPP R-CHOP | IDRC          | 0.68      | 0.99        | 1.00        |
| LLMPP R-CHOP | MDFCI         | 0.53      | 0.94        | 0.99        |
| LLMPP CHOP   | LLMPPP R-CHOP | 0.48      | 0.95        | 0.99        |
| LLMPP CHOP   | CHEPRETRO     | 0.51      | 0.97        | 1.00        |
| LLMPP CHOP   | IDRC          | 0.62      | 0.99        | 1.00        |
| LLMPP CHOP   | MDFCI         | 0.62      | 0.99        | 1.00        |
| IDRC         | CHOP          | 1.39      | 0.99        | 1.00        |
| IDRC         | RCHOP         | 1.08      | 0.97        | 1.00        |
| IDRC         | CHEP          | 1.32      | 0.99        | 1.00        |
| IDRC         | MDFCI         | 1.19      | 0.98        | 1.00        |
| MDFCI        | LLMPP CHOP    | 0.74      | 1.00        | 1.00        |
| MDFCI        | LLMPP R-CHOP  | 0.51      | 0.90        | 0.97        |
| MDFCI        | CHEPRETRO     | 0.50      | 0.89        | 0.93        |
| MDFCI        | IDRC          | 0.70      | 1.00        | 1.00        |
| Median       | -             | 0.62      | 0.97        | 1.00        |

Table S6: Optimal thresholds for RLE IQR
